# Supplementary material for: 10-Gingerol Targets Lipid Rafts Associated PI3K/Akt Signaling in Radio-Resistant Triple Negative Breast Cancer Cells
Source: MDPI journal article supplement (doi:10.3390/molecules25143164), 2020-07-10

## 10-Gingerol targets lipid rafts associated PI3K/Akt signaling in radio-resistant triple negative breast cancer cells.

### Supplementary file 1

Figure S1: Effects of 10-gingerol on MDA-MB-231 cell viability

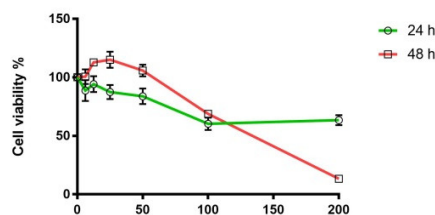

IC<sub>50</sub>- 234.4 μM (24 h) and 191.9 μM (48 h)

Figure S2: Lipophilicity prediction of 10-gingerol using the SwissADME webserver

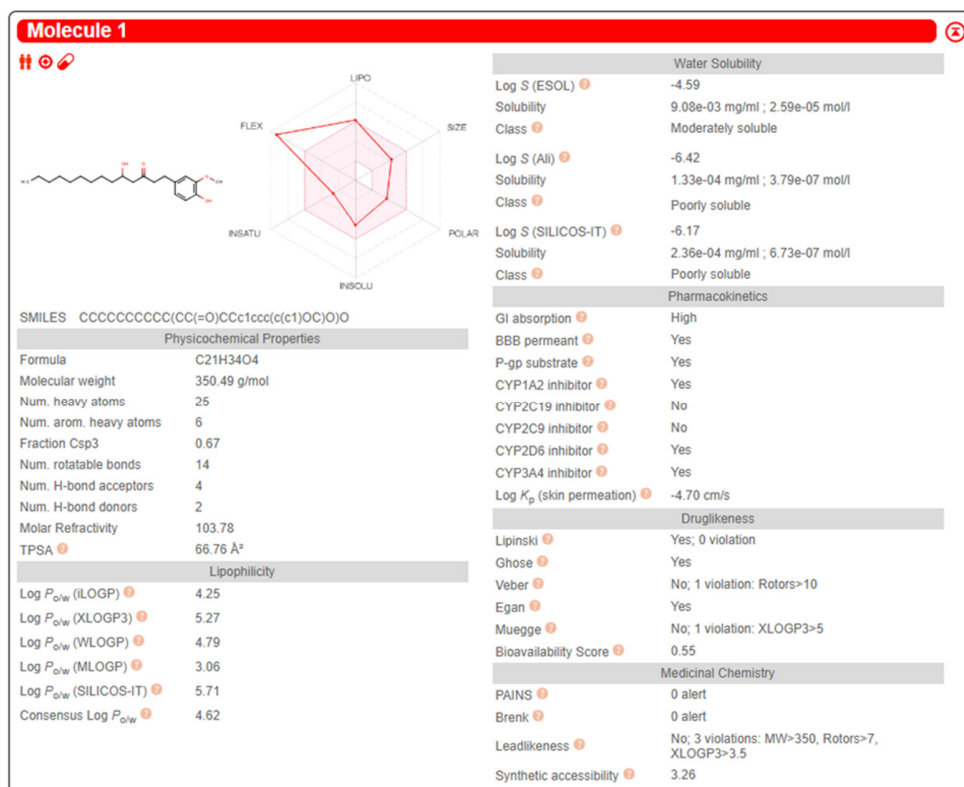

Figure S3: Effects of 10-gingerol on the total expression of caveolin-1 in MDA-MB-231/IR cells

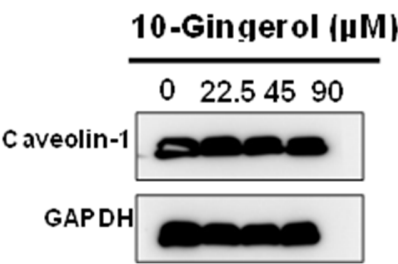

Figure S4. Comparison of lipid rafts cholesterol levels in MDA-MB-231 and MDA-MB-231/IR cells. \*P<0.05 and \*\*\*P<0.001 compared with MDA-MB-231 cells.

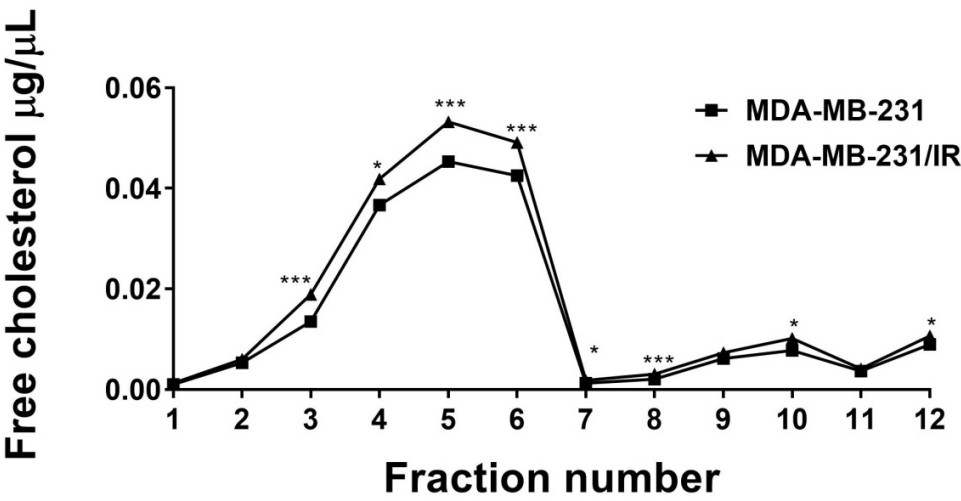

Supplement: s1 [file s1]
